# Supplementary material for: Seroepidemiology and molecular diversity of Leishmania donovani complex in Georgia
Source: PubMed Central journal article supplement (PMC4866401; doi:10.1186/s13071-016-1558-6), 2016-05-13
Supplement: 13071_2016_1558_MOESM1_ESM.pdf [file 13071_2016_1558_MOESM1_ESM.pdf]

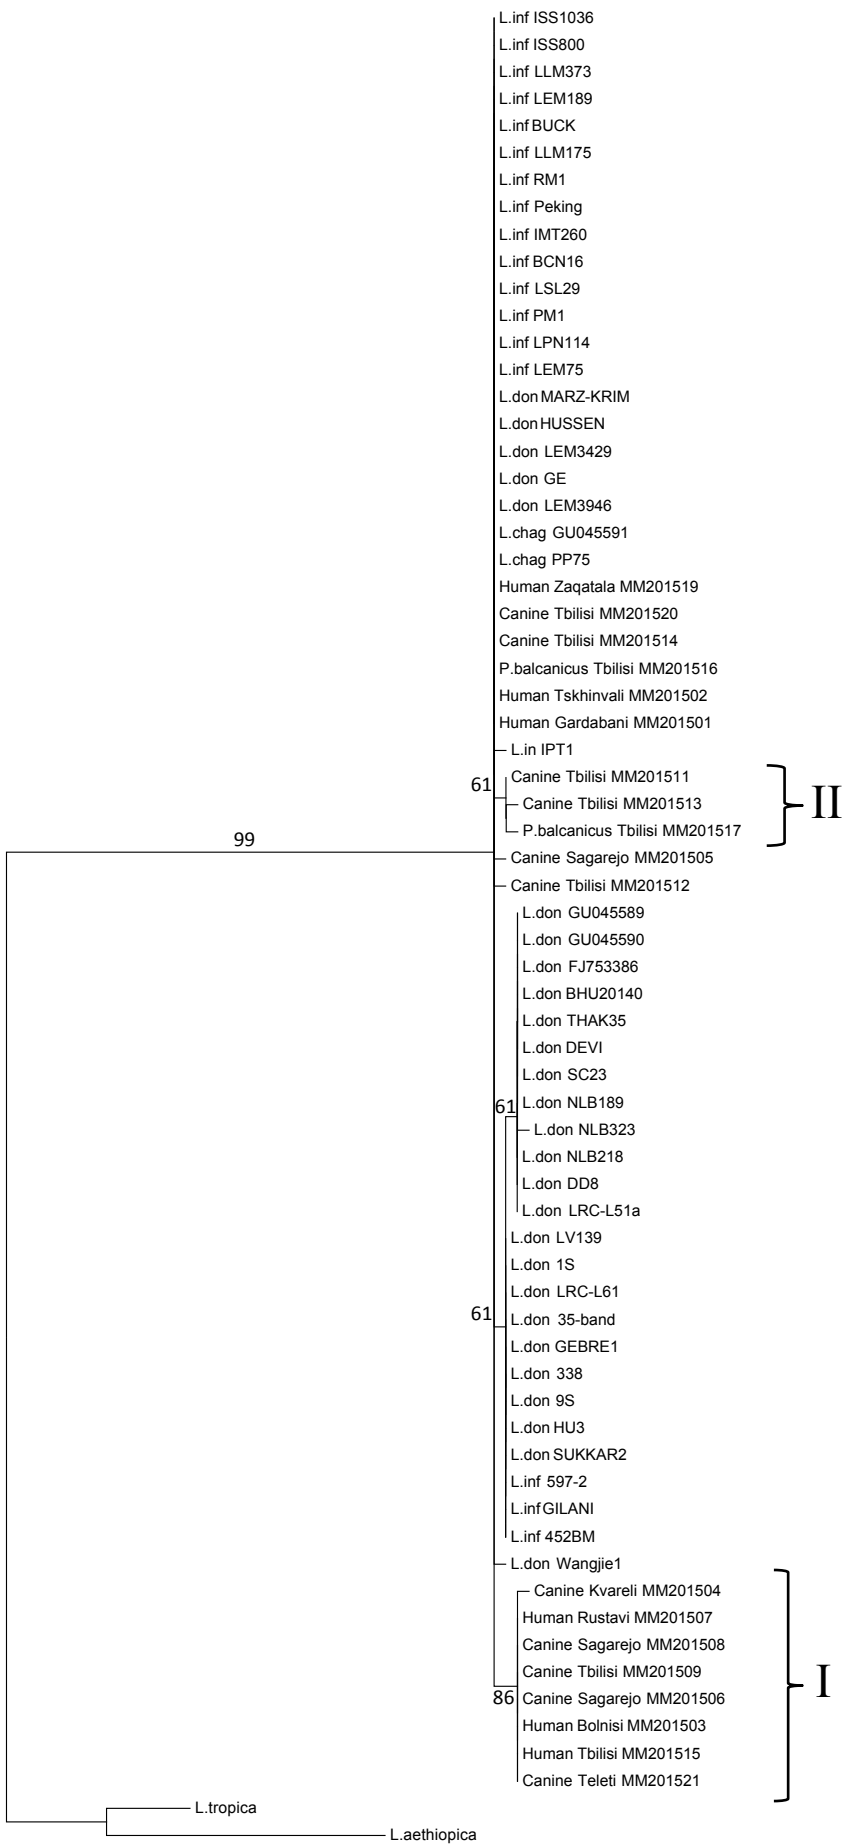

0.005
