# Supplementary material for: Seroepidemiology and molecular diversity of Leishmania donovani complex in Georgia
Source: PubMed Central journal article supplement (PMC4866401; doi:10.1186/s13071-016-1558-6), 2016-05-13

Consensus Identity

Human\_Rustavi\_MM201507  
 Canine\_Sagarejo\_MM201508  
 Canine\_Tbilisi\_MM201509  
 Human\_Gardabani\_MM201501  
 Human\_Tskhinvali\_MM201502  
 Canine\_Kvareli\_MM201504  
 Canine\_Sagarejo\_MM201505  
 Canine\_Sagarejo\_MM201506  
 Human\_Bolnisi\_MM201503  
 Canine\_Tbilisi\_MM201511  
 Canine\_Tbilisi\_MM201512  
 Canine\_Tbilisi\_MM201513  
 Human\_Tbilisi\_MM201515  
 P.balcanicus\_Tbilisi\_MM201516  
 P.balcanicus\_Tbilisi\_MM201517  
 Canine\_Tbilisi\_MM201514  
 Canine\_Tbilisi\_MM201520  
 Human\_Zaqatala\_MM201519  
 Canine\_Teleti\_MM201521  
 L.chag\_PP75  
 L.chag\_GU045591  
 L.don\_LRC-L51a  
 L.don\_LV139  
 L.don\_DD8  
 L.don\_1S  
 L.don\_NLB218  
 L.don\_NLB323  
 L.don\_LEM3946  
 L.don\_GE  
 L.don\_LEM3429  
 L.don\_HUSSEN  
 L.don\_LRC-L61  
 L.don\_35-band  
 L.don\_GEBRE1  
 L.don\_338  
 L.don\_9S  
 L.don\_HU3  
 L.don\_NLB189  
 L.don\_SC23  
 L.don\_DEVI  
 L.don\_THAK35  
 L.don\_BHU20140  
 L.don\_FJ753386  
 L.don\_GU045589  
 L.don\_GU045590  
 L.don\_Wangjie1  
 L.don\_MARZ-KRIM  
 L.don\_SUKKAR2  
 L.inf\_LEM75  
 L.inf\_LPN114  
 L.inf\_PMI  
 L.inf\_LSL29  
 L.inf\_BCN16  
 L.inf\_IMT260  
 L.inf\_Peking  
 L.inf\_RM1  
 L.inf\_LLM175  
 L.inf\_BUCK  
 L.inf\_LEM189  
 L.inf\_LLM373  
 L.inf\_ISS1036  
 L.inf\_ISS800  
 L.inf\_597-2  
 L.inf\_GILANI  
 L.inf\_452BM  
 L.in\_IPT1  
 L.tropica (FJ948458)  
 L.aethiopia (GQ920674)

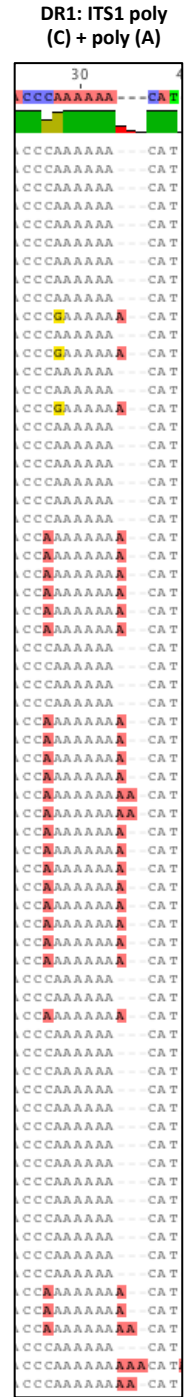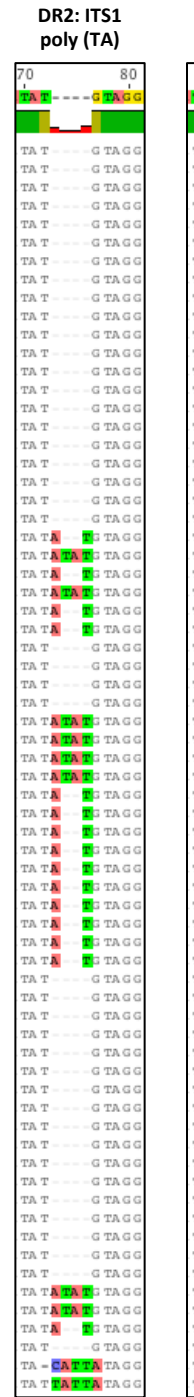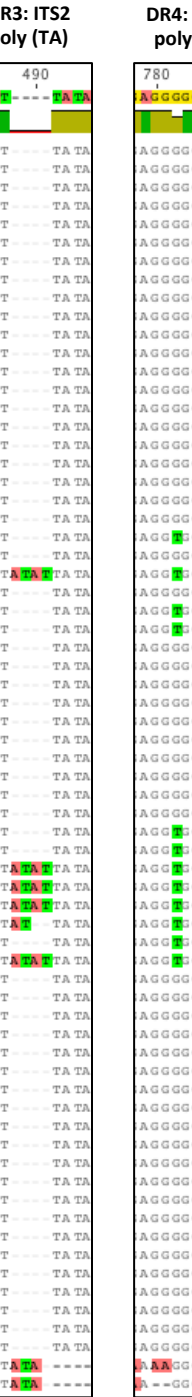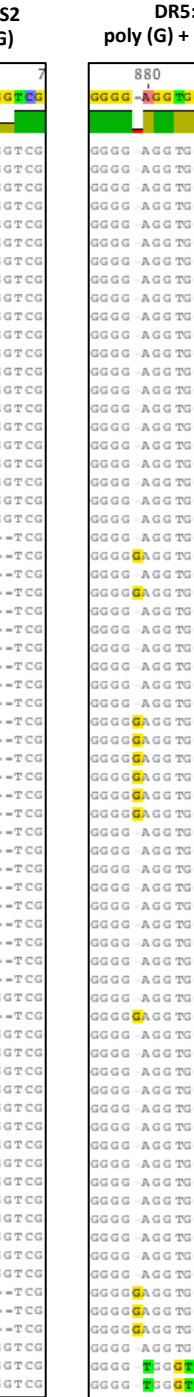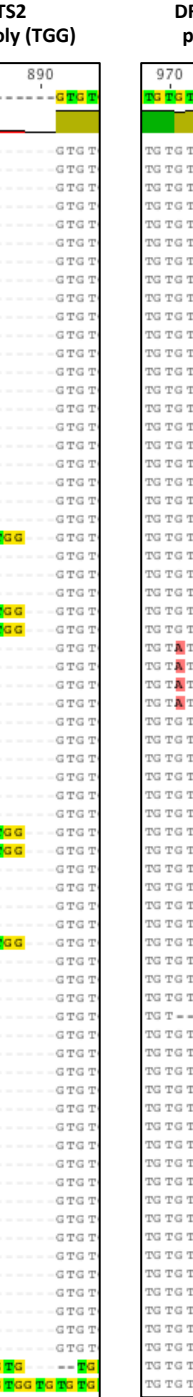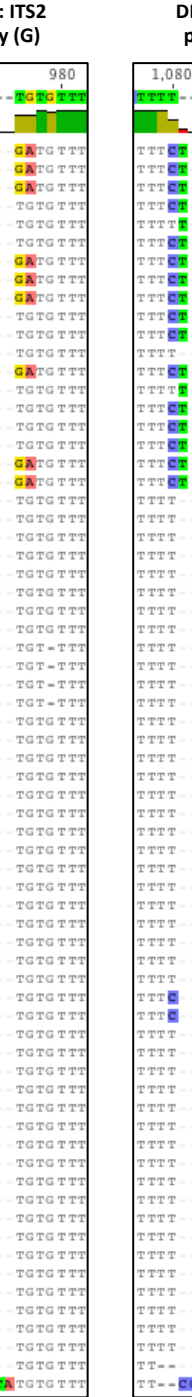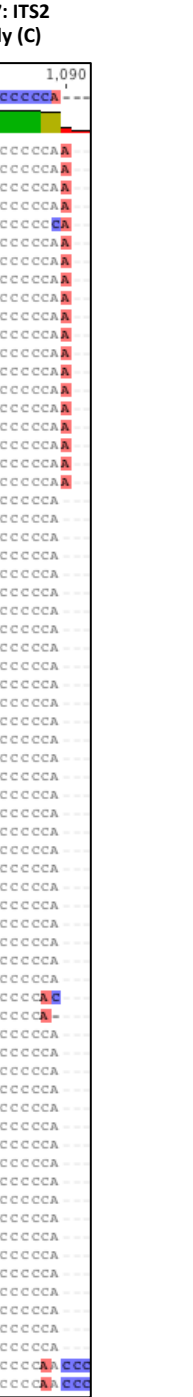

Supplement: 13071_2016_1558_MOESM2_ESM.pdf [file 13071_2016_1558_MOESM2_ESM.pdf]
